# Supplementary material for: Novel Synthetic Monothiourea Aspirin Derivatives Bearing Alkylated Amines as Potential Antimicrobial Agents
Source: Hindawi journal article supplement (doi:10.1155/2017/2378186), 2017-01-01

## Supplementary Data

### Novel Synthetic Monothiourea Aspirin Derivatives Bearing Alkylated Amines as Potential Antimicrobial Agents

Norsyafikah Asyilla Nordin<sup>a</sup>, Tchan Wei Chai<sup>a</sup>, Bee Ling Tan<sup>a</sup>, Ching Liang Choi<sup>a</sup>, Ainaa Nadiyah Abd Halim<sup>a</sup>, Hasnain Hussain<sup>b</sup> and Zainab Ngaini<sup>a\*</sup>

<sup>a</sup>*Department of Chemistry, <sup>b</sup>Department of Molecular Biology, Faculty of Resource Science and Technology, Universiti Malaysia Sarawak, 94300 Kota Samarahan, Sarawak, Malaysia*

*Corresponding author full name and email address:*

*\*Assoc. Prof. Dr. Zainab Ngaini*

*E-mail: nzainab@unimas.my/[nzainab@gmail.com](mailto:nzainab@gmail.com)*

### Table of Contents

1. FTIR spectra of **1-12**
2. <sup>1</sup>H NMR spectra **1-12**
3. <sup>13</sup>C NMR spectra of **1-12**
4. Inhibition zones of **1-12** against *E. coli*
5. Inhibition zones of **1-12** against *S. aureus*

## 1. FTIR spectra of 1-12

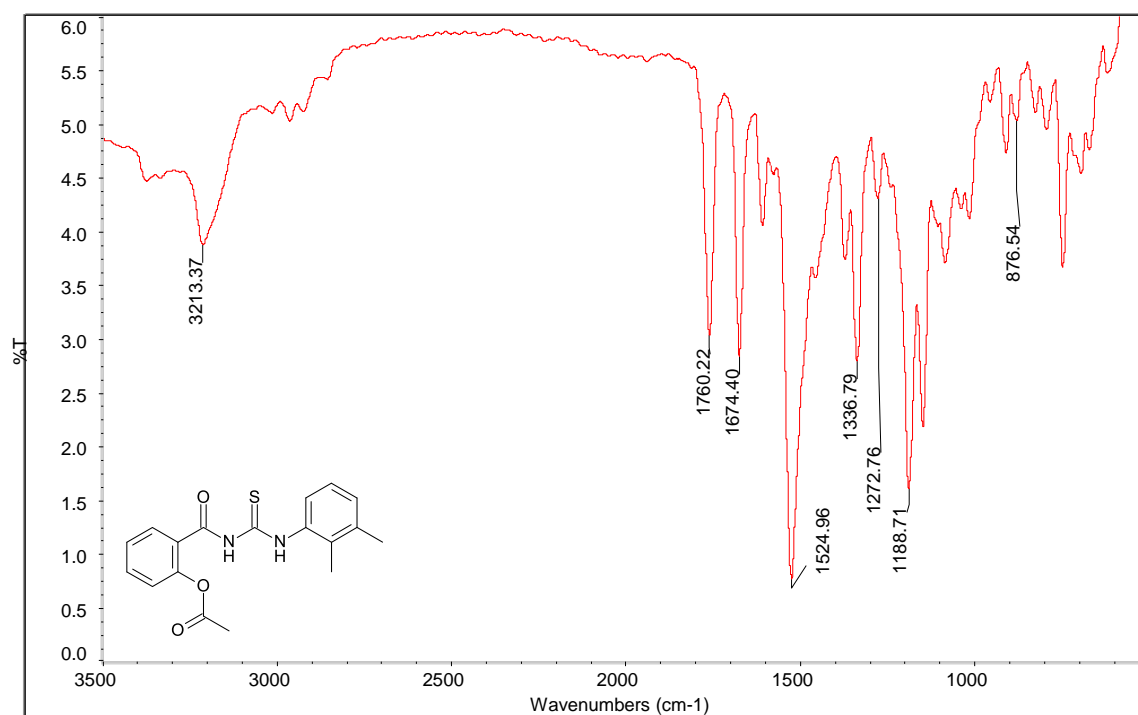

FTIR spectrum of **1**

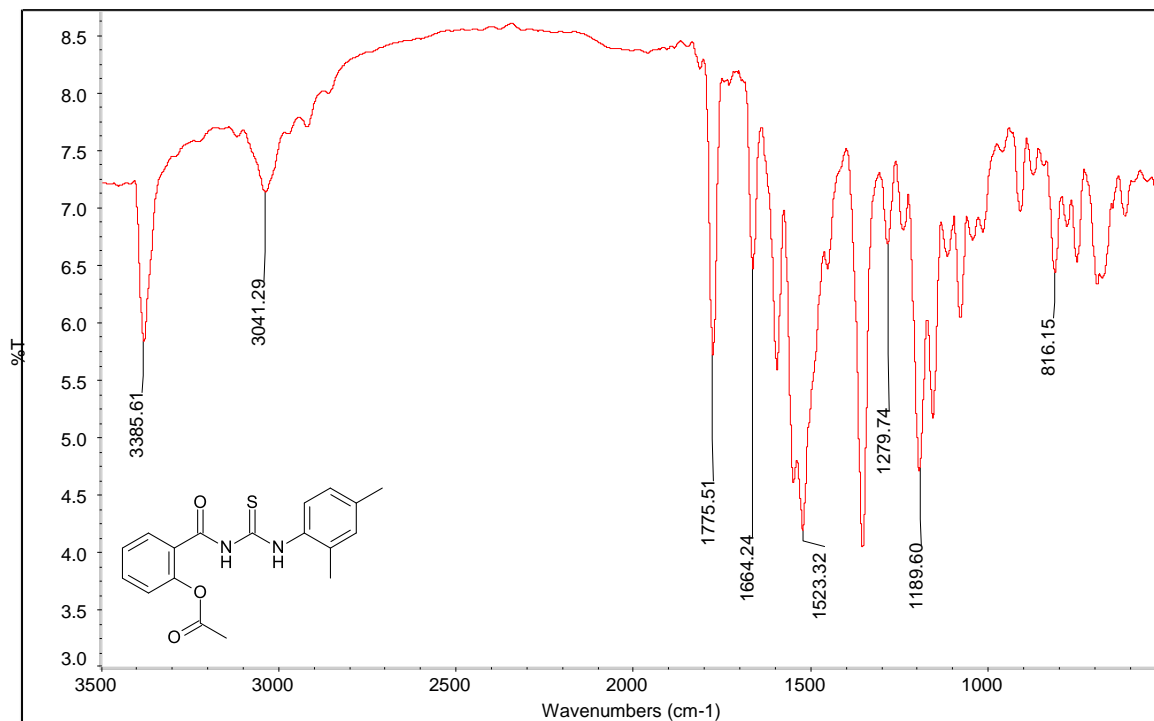

FTIR spectrum of **2**

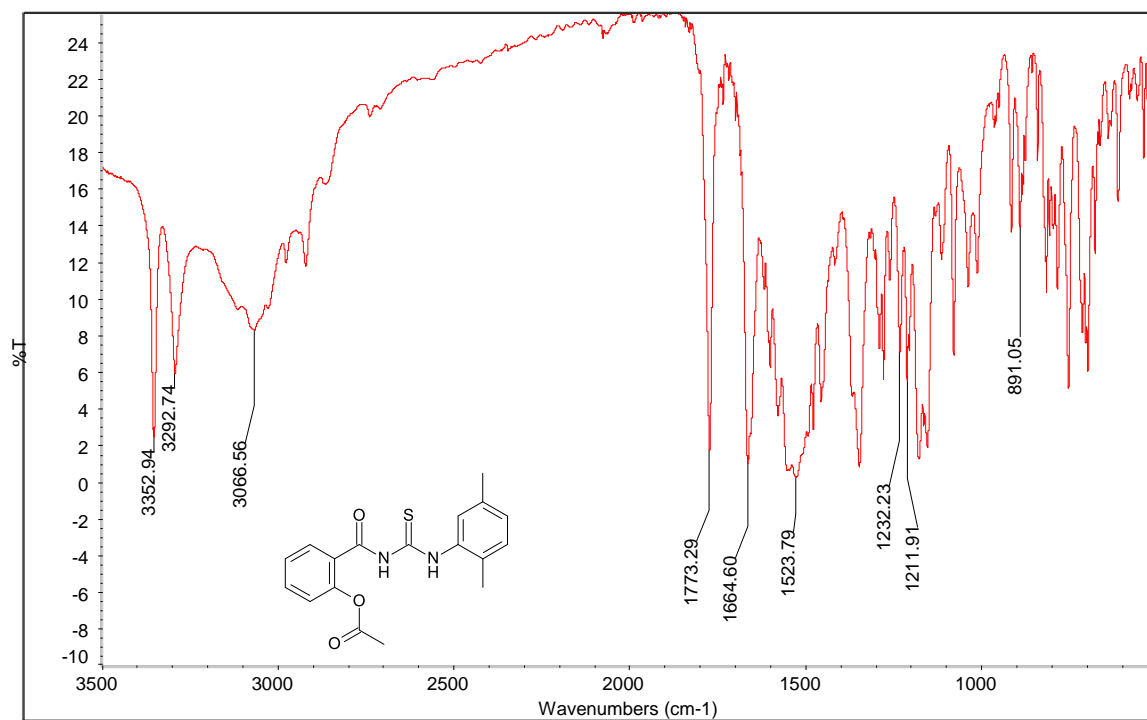

FTIR spectrum of **3**

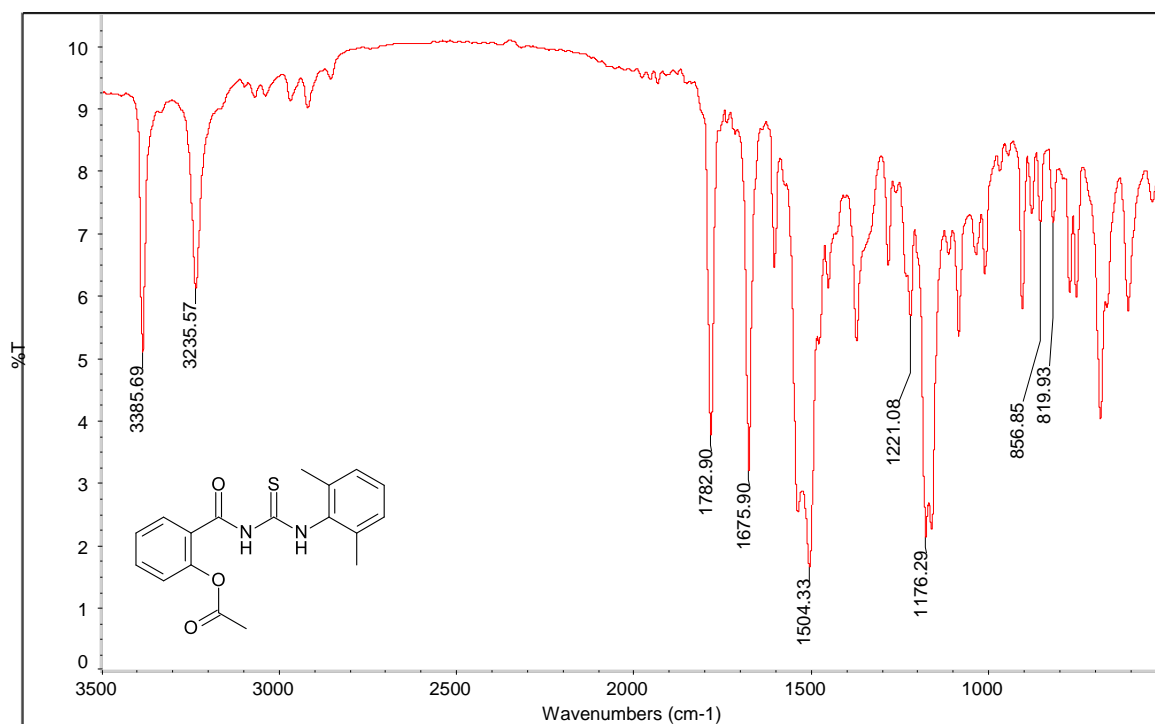

FTIR spectrum of **4**

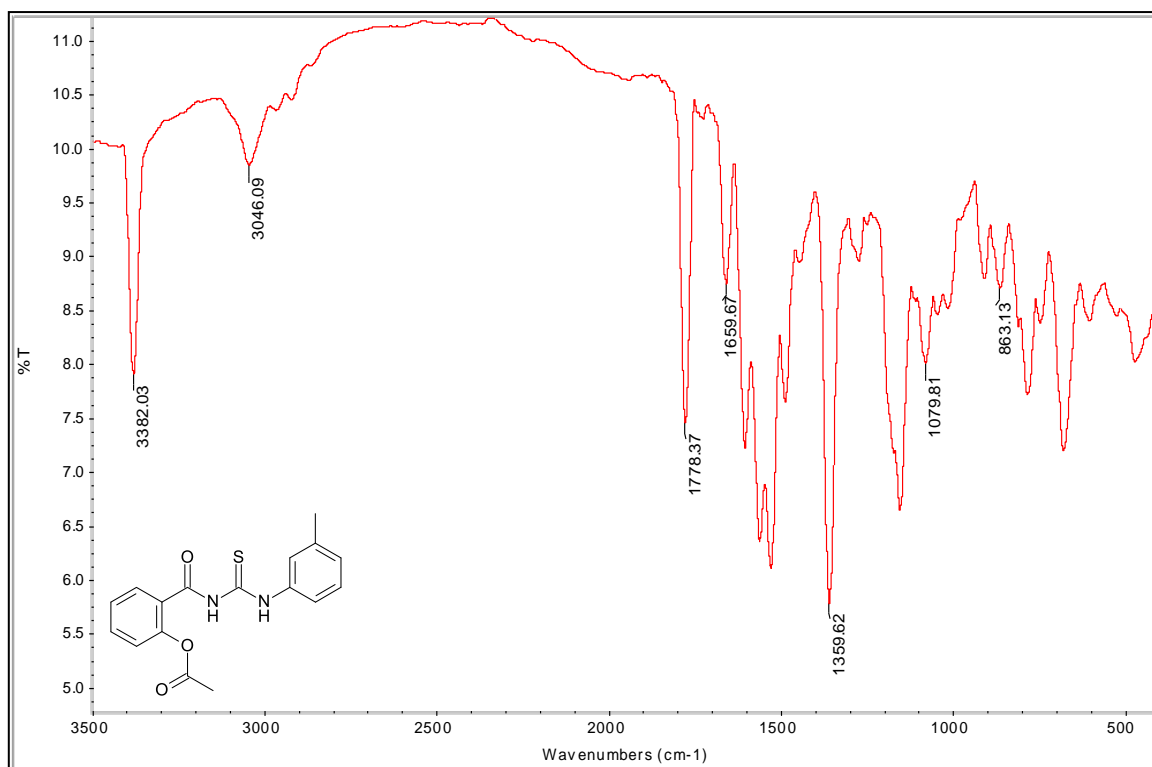

FTIR spectrum of **5**

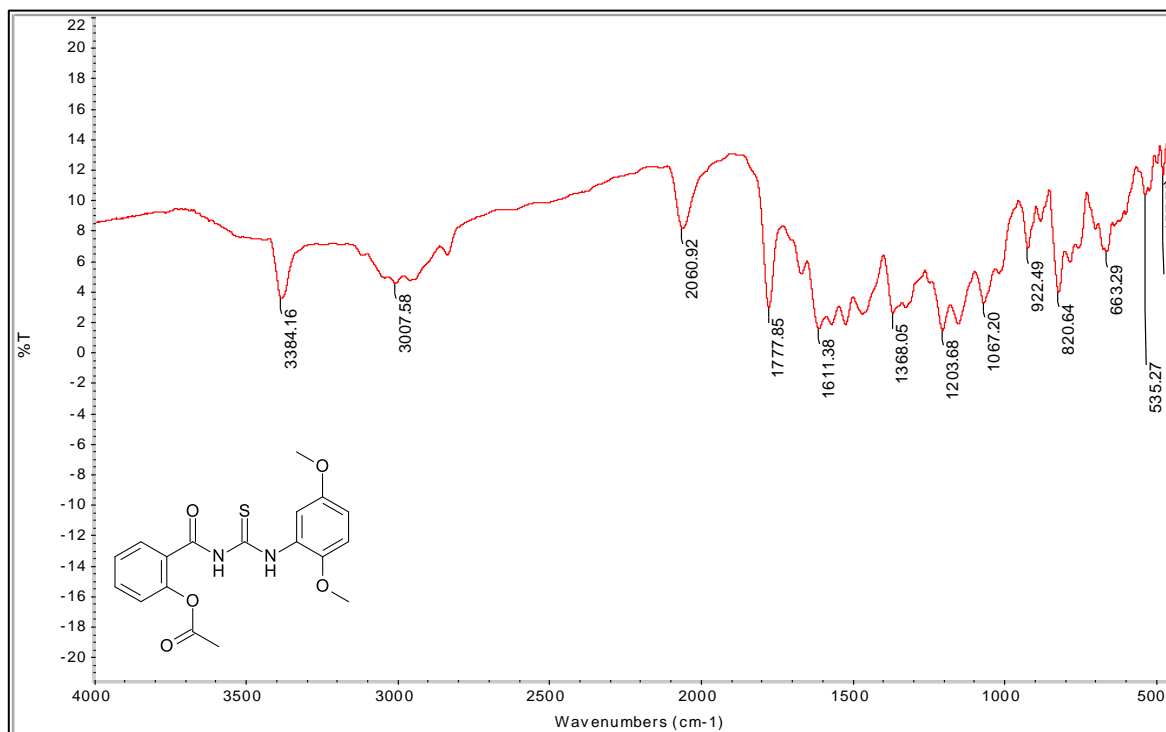

FTIR spectrum of **6**

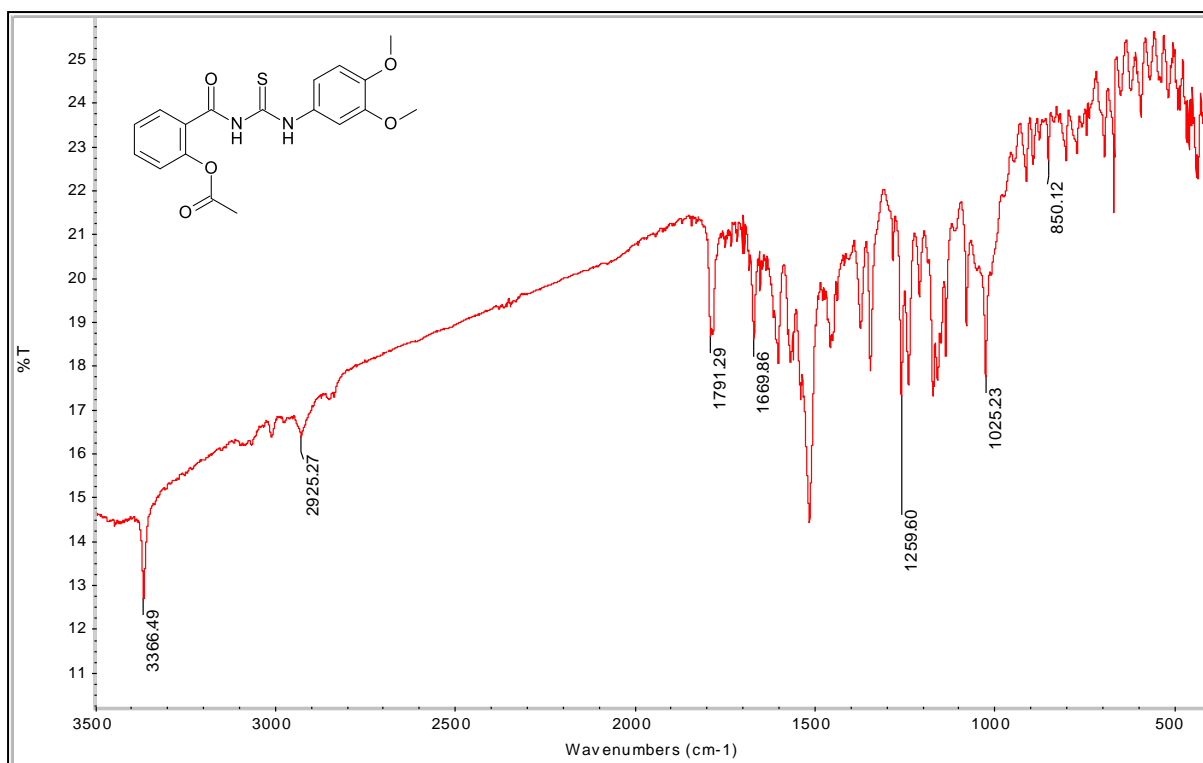

FTIR spectrum of **7**

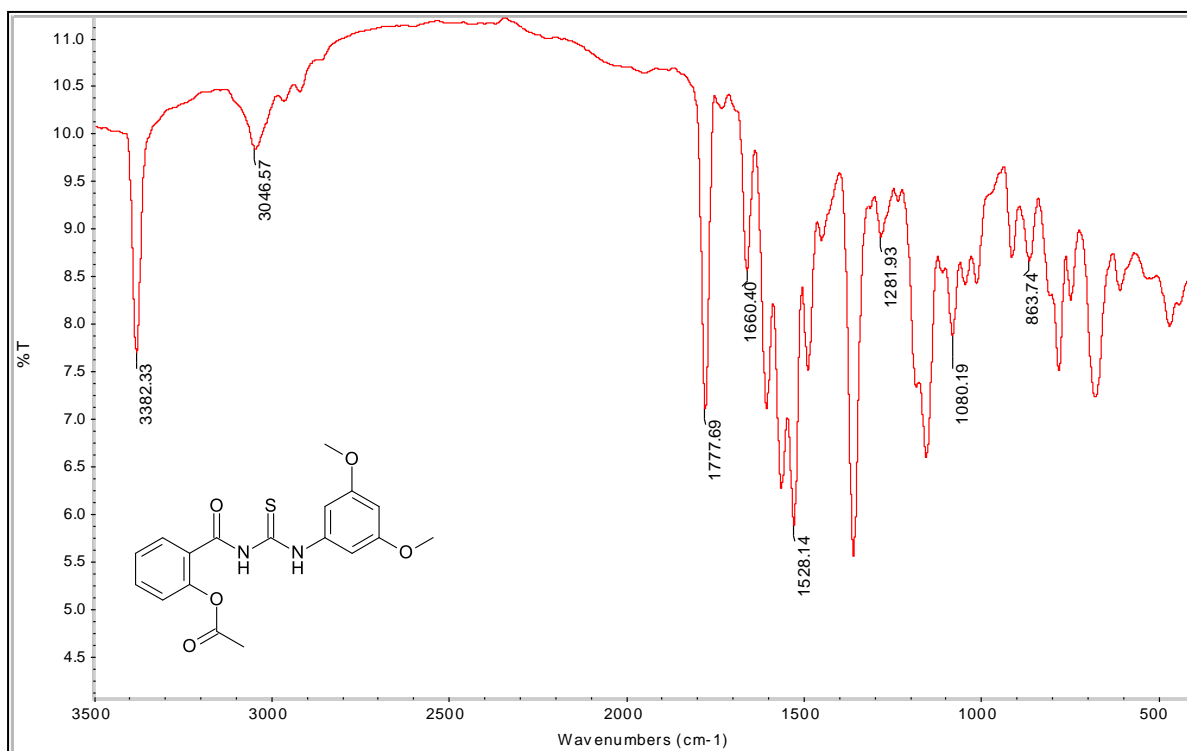

FTIR spectrum of **8**

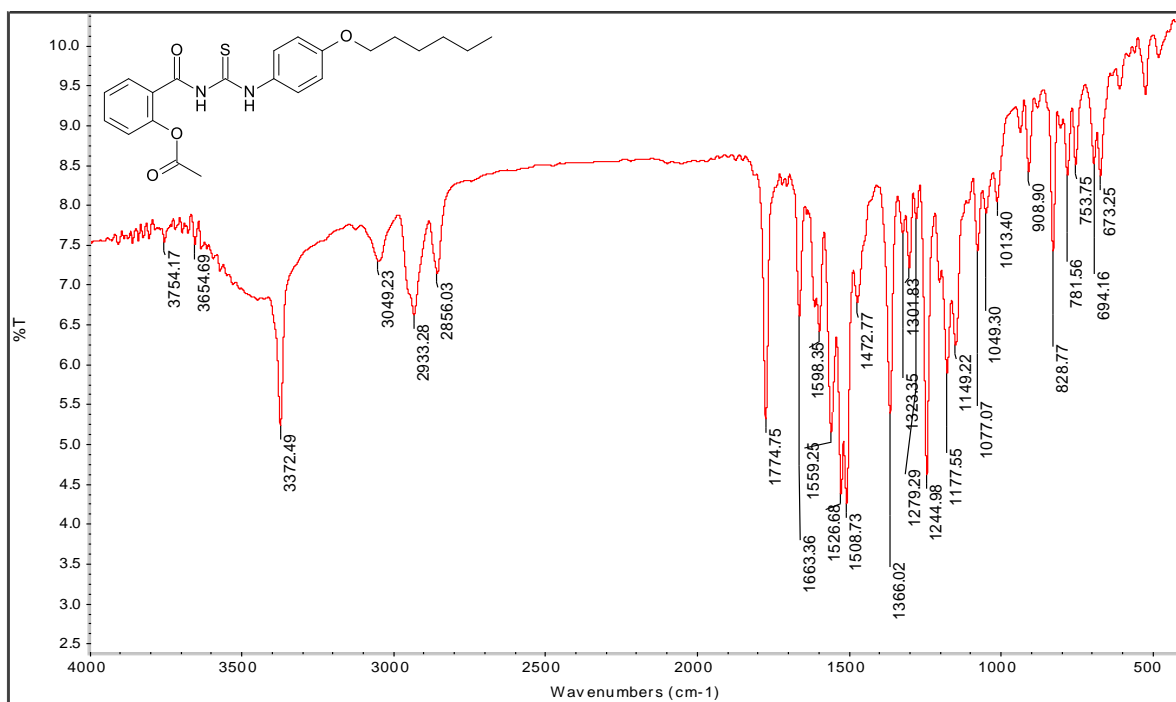

FTIR spectrum of **9**

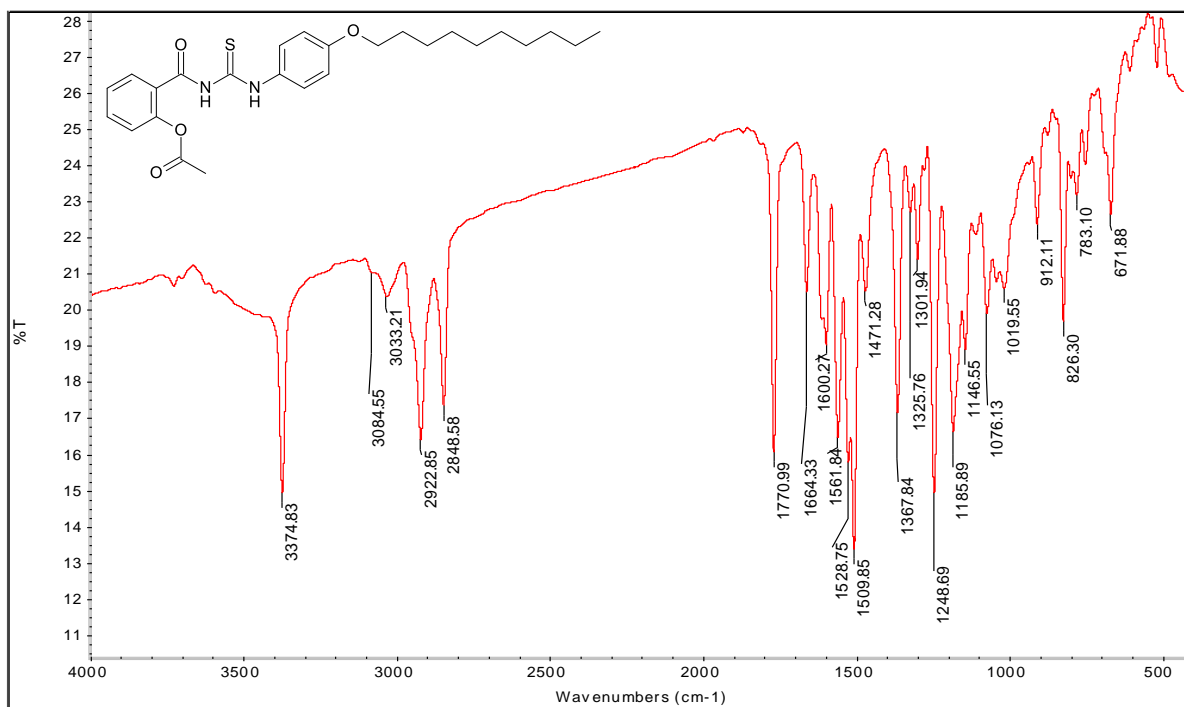

FTIR spectrum of **10**

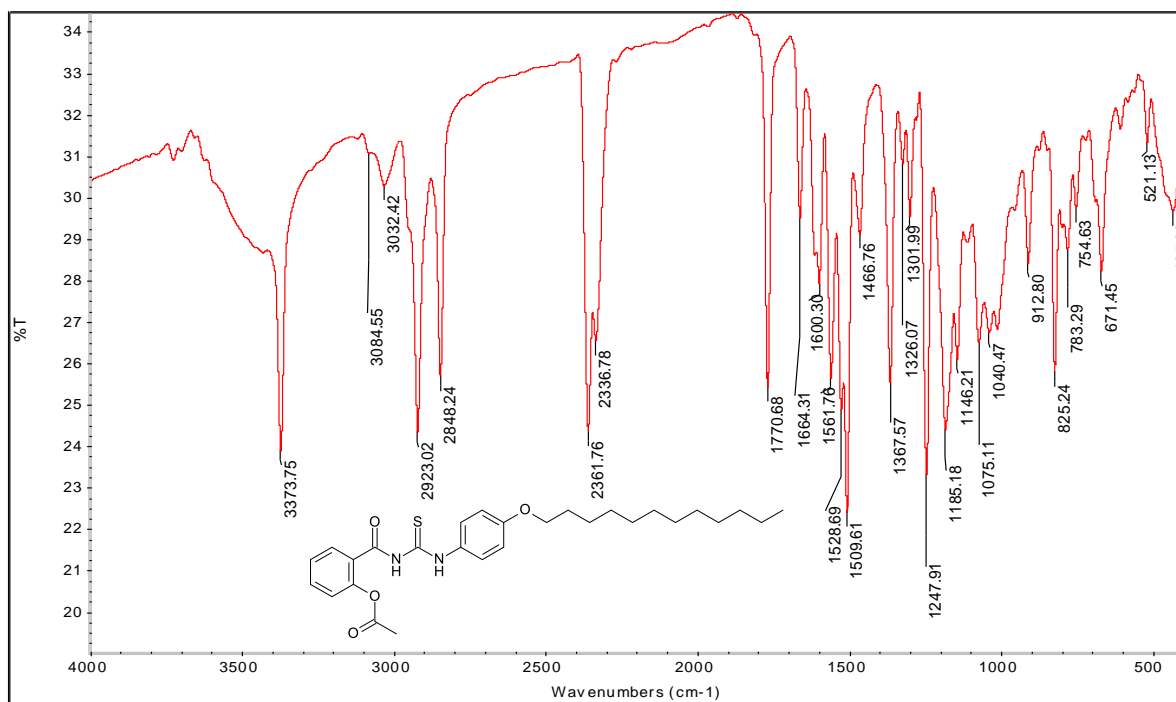

FTIR spectrum of **11**

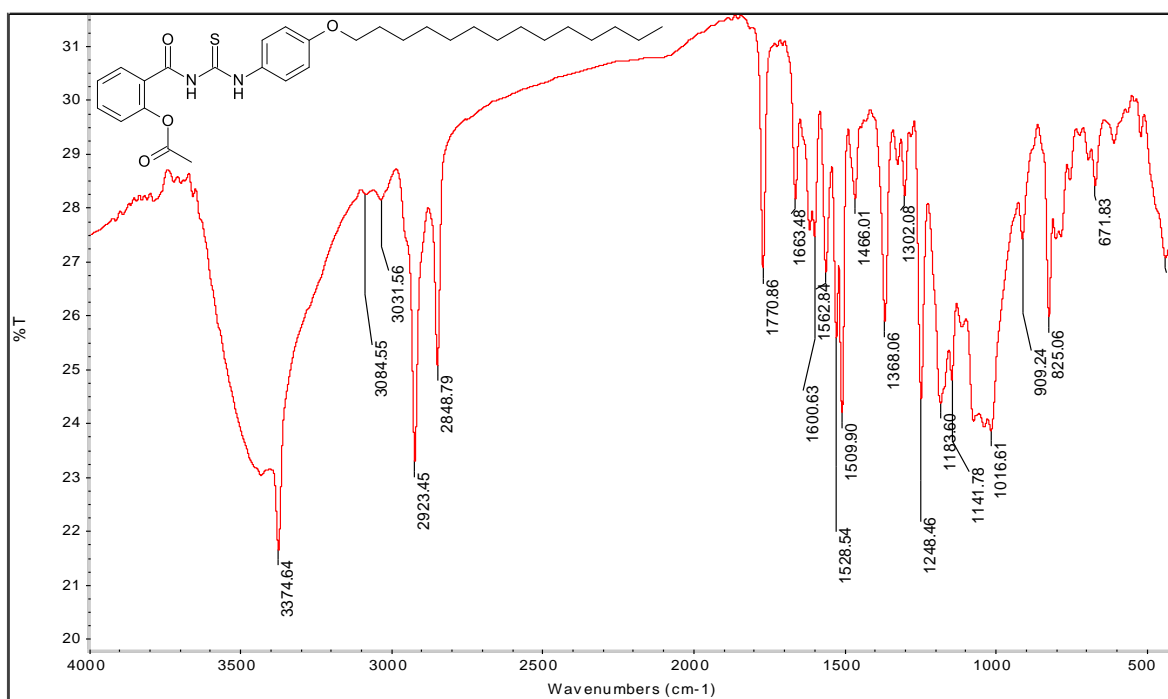

FTIR spectrum of **12**

## 2. $^1\text{H}$ NMR spectra 1-12

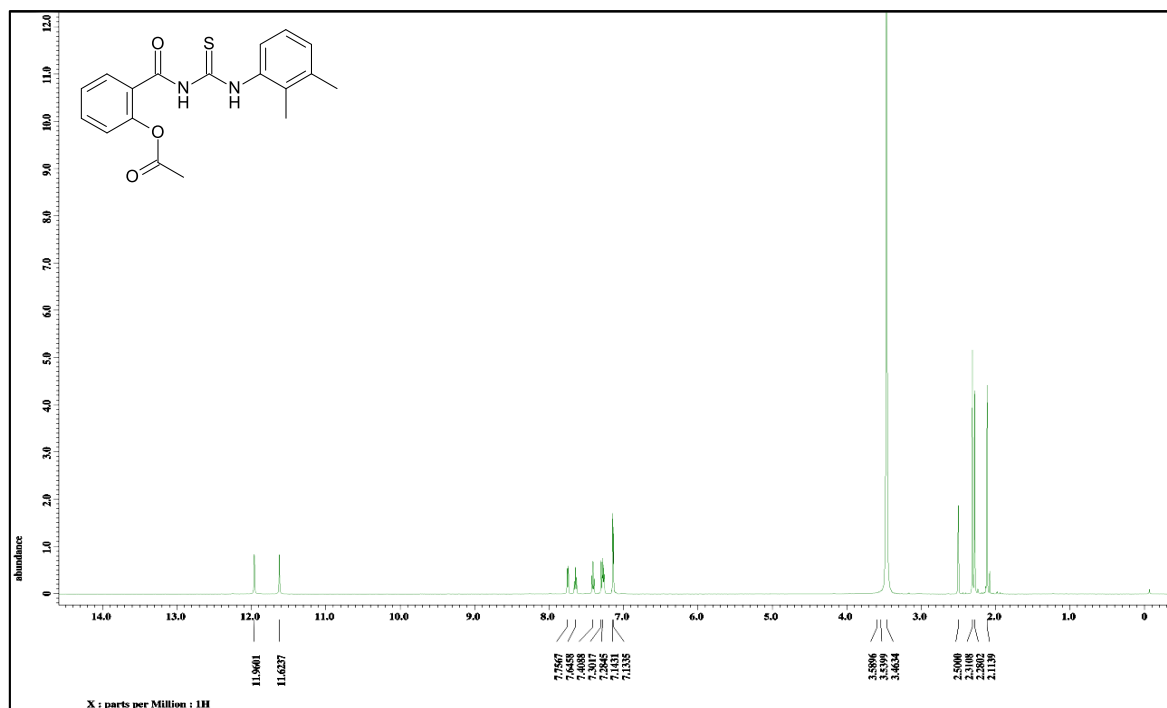

$^1\text{H}$  NMR spectrum of 1

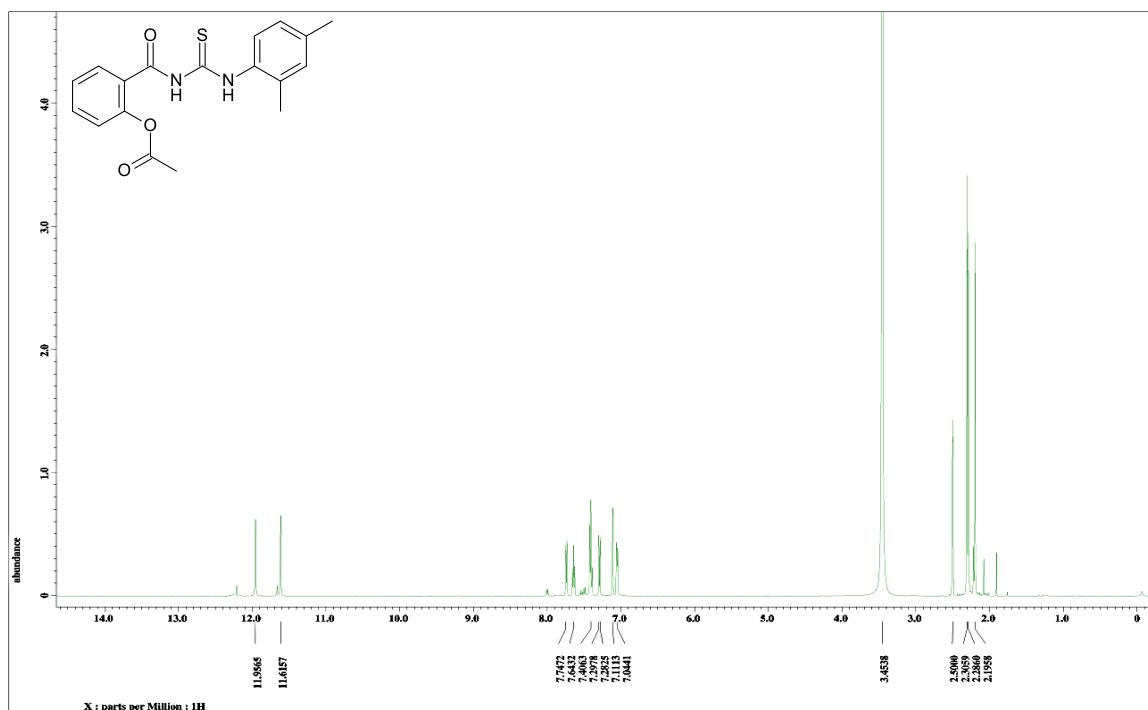

$^1\text{H}$  NMR spectrum of 2



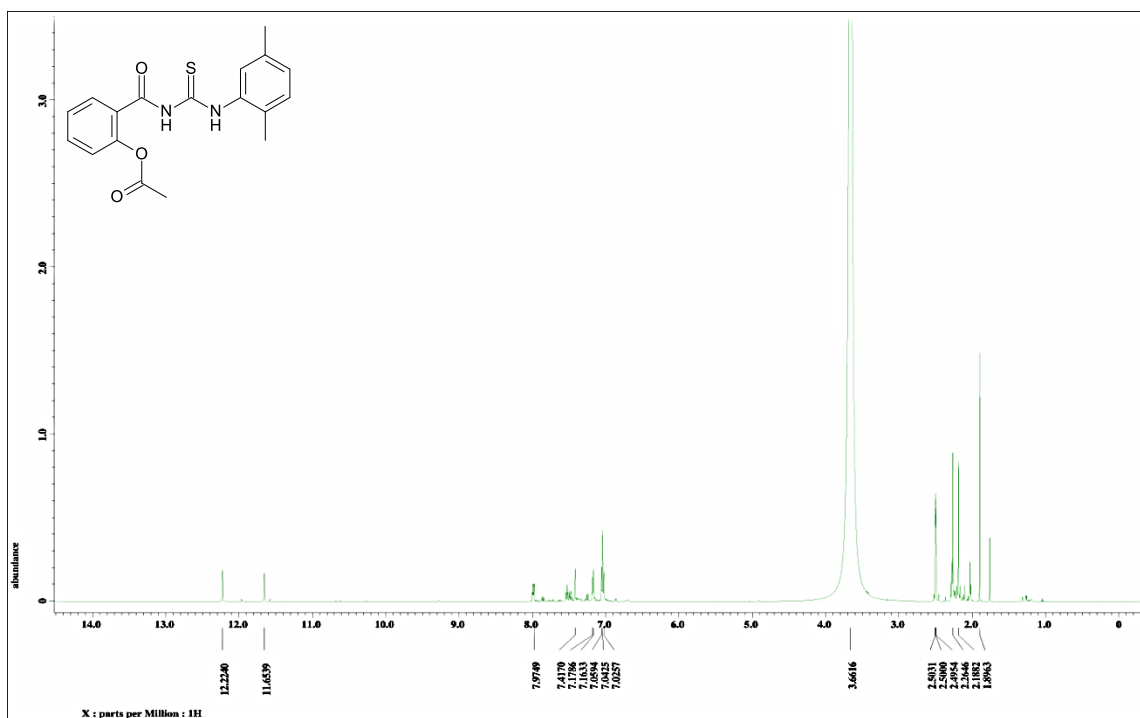

<sup>1</sup>H NMR spectrum of **3**

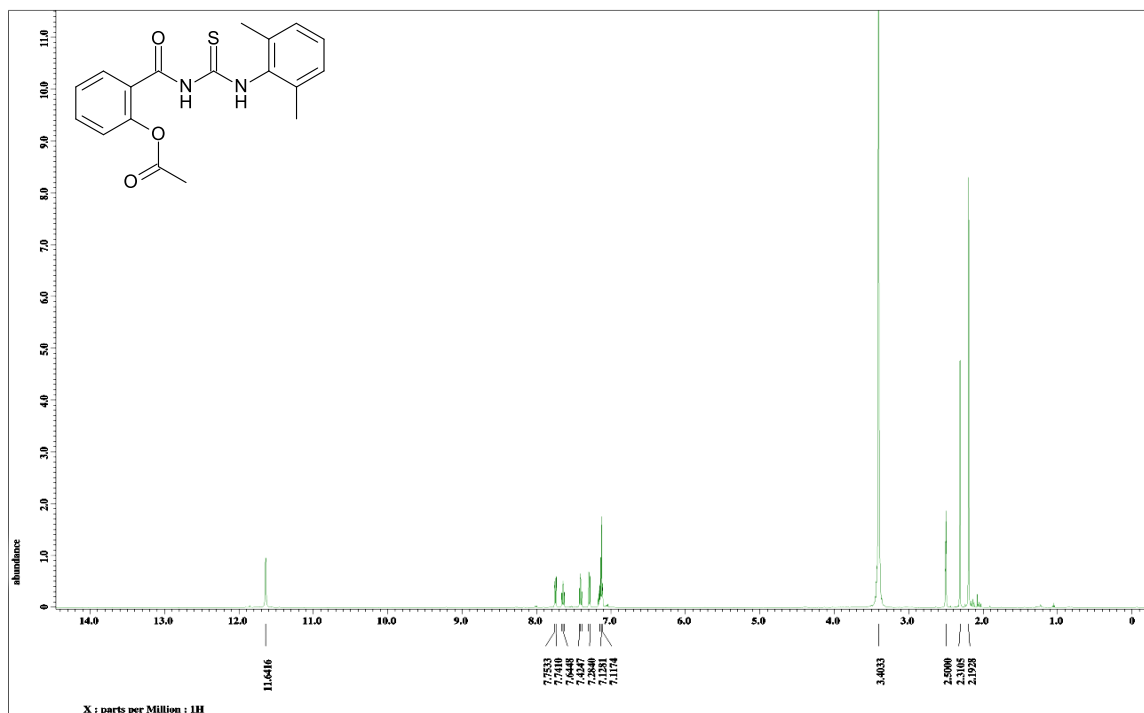

<sup>1</sup>H NMR spectrum of **4**

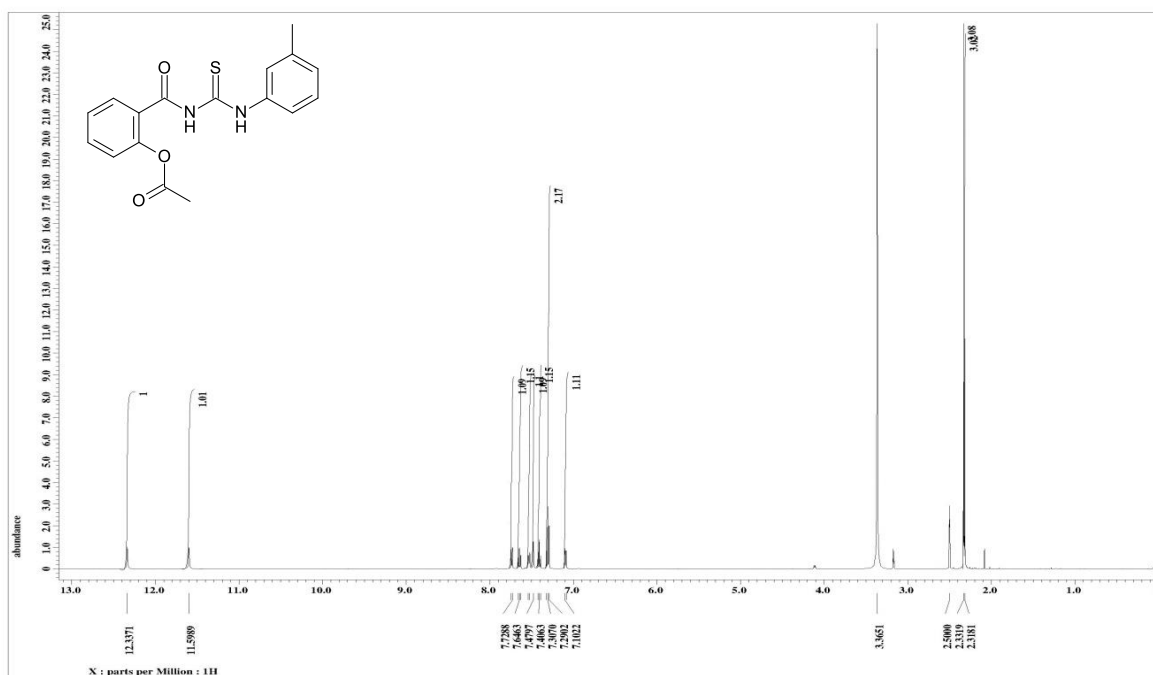

<sup>1</sup>H NMR spectrum of **5**

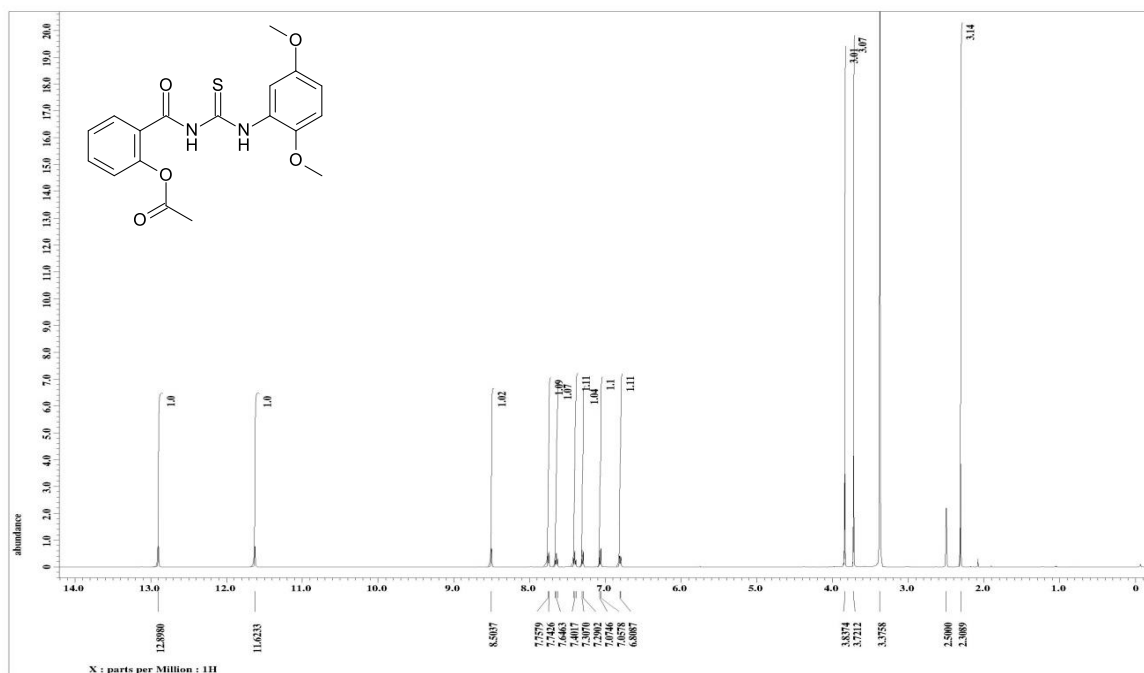

<sup>1</sup>H NMR spectrum of **6**

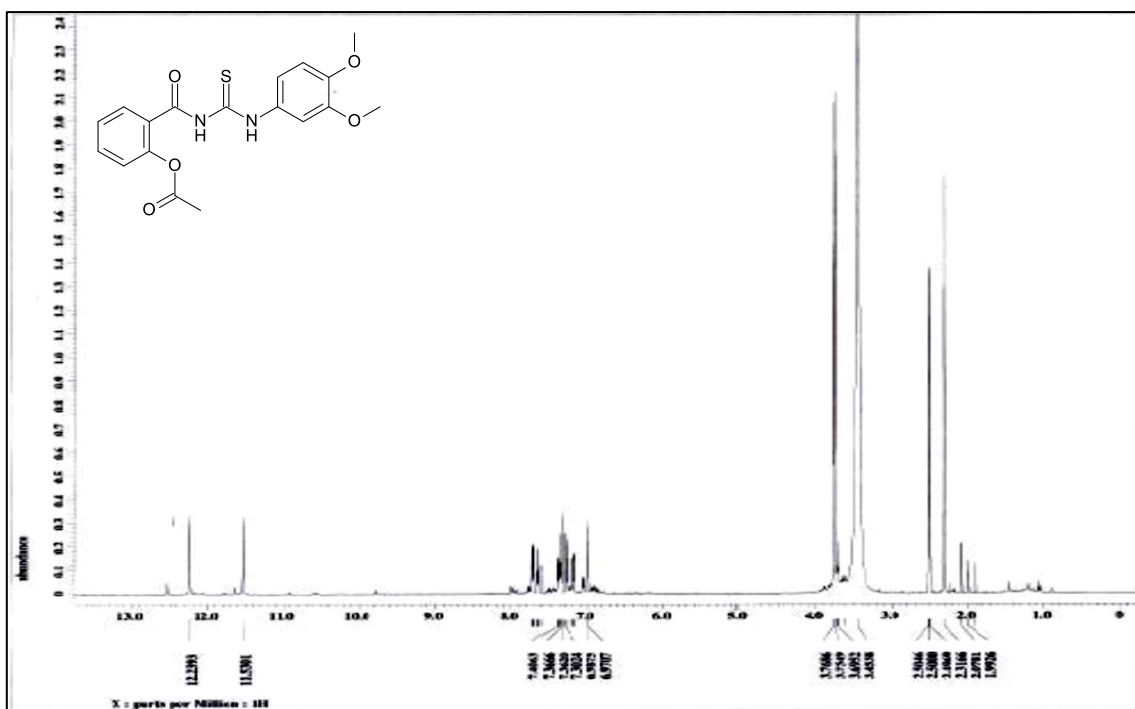

<sup>1</sup>H NMR spectrum of 7

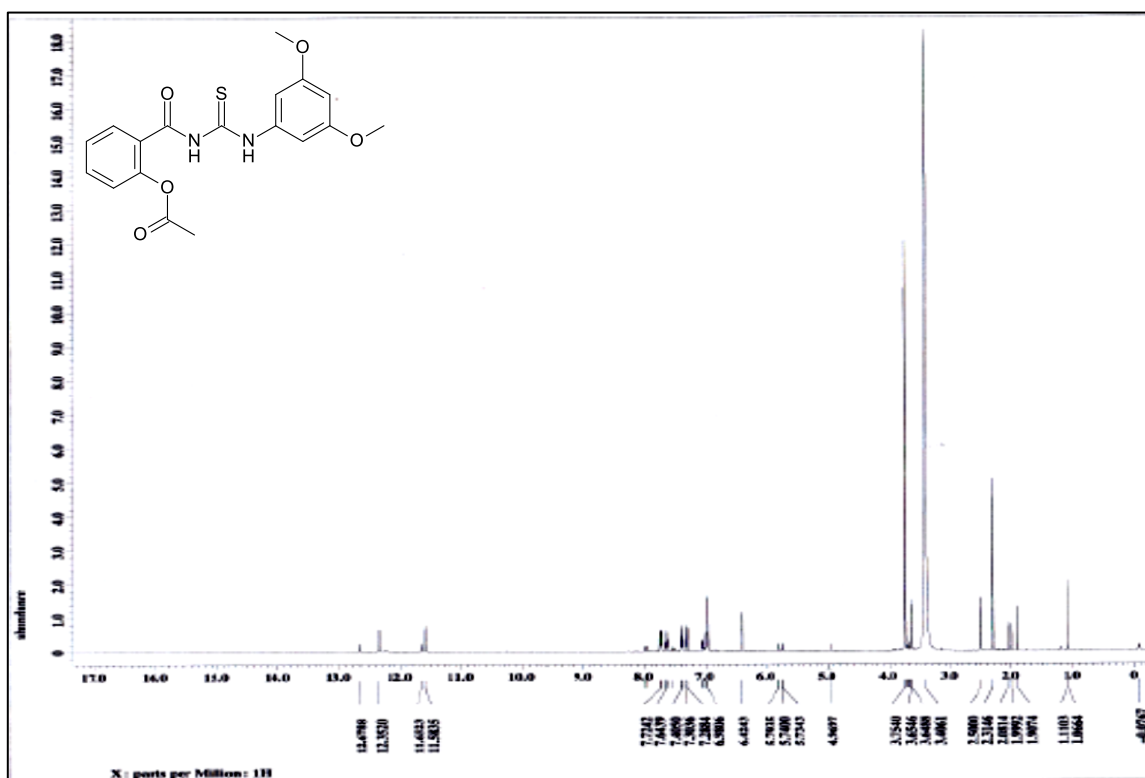

<sup>1</sup>H NMR spectrum of 8

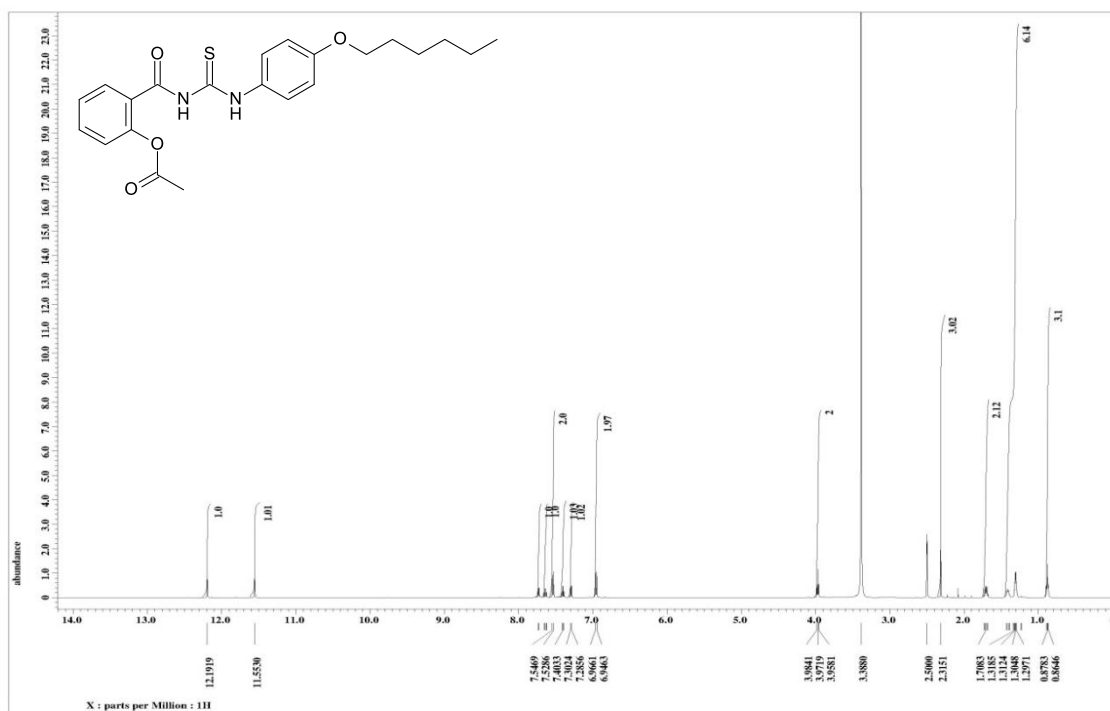

<sup>1</sup>H NMR spectrum of **9**

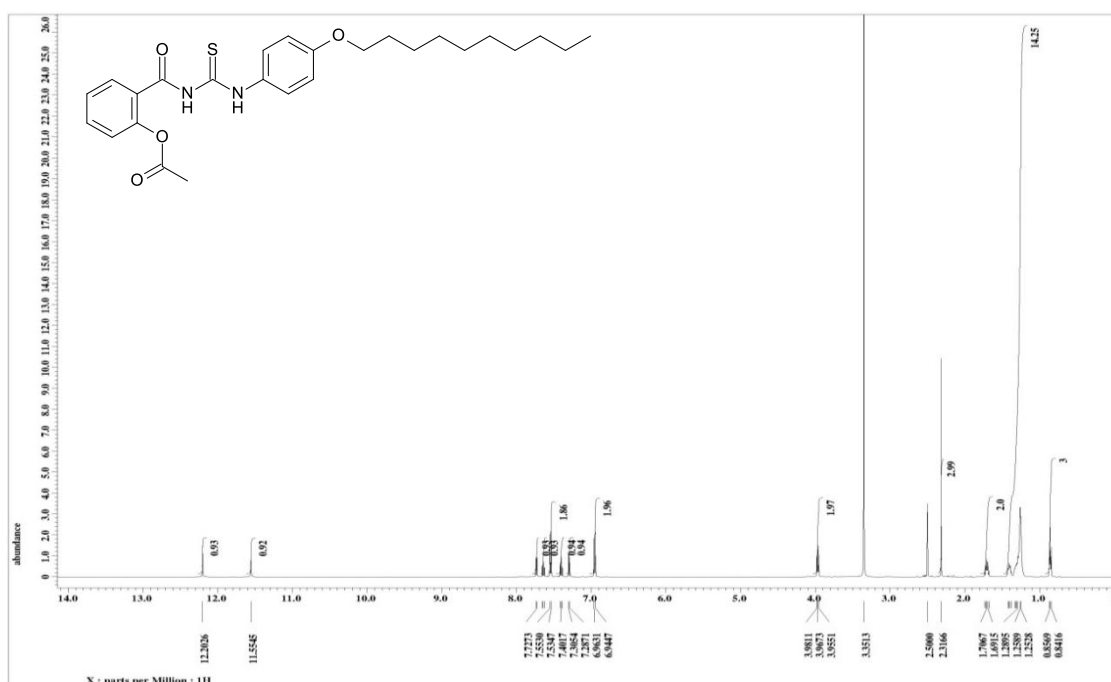

<sup>1</sup>H NMR spectrum of **10**

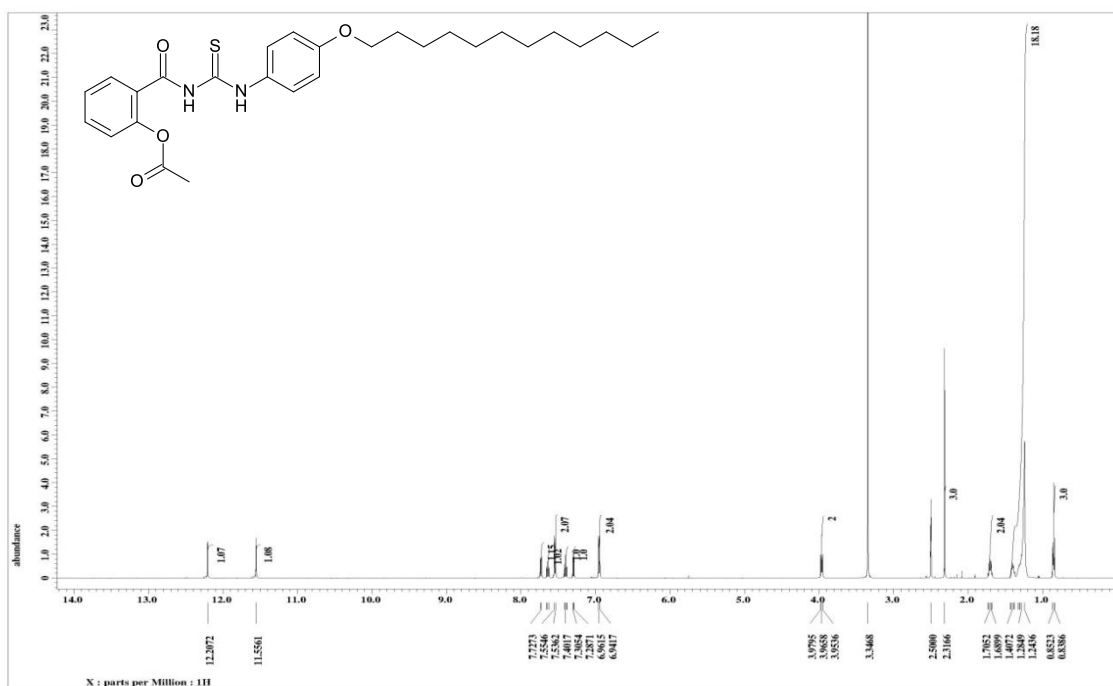

<sup>1</sup>H NMR spectrum of **11**

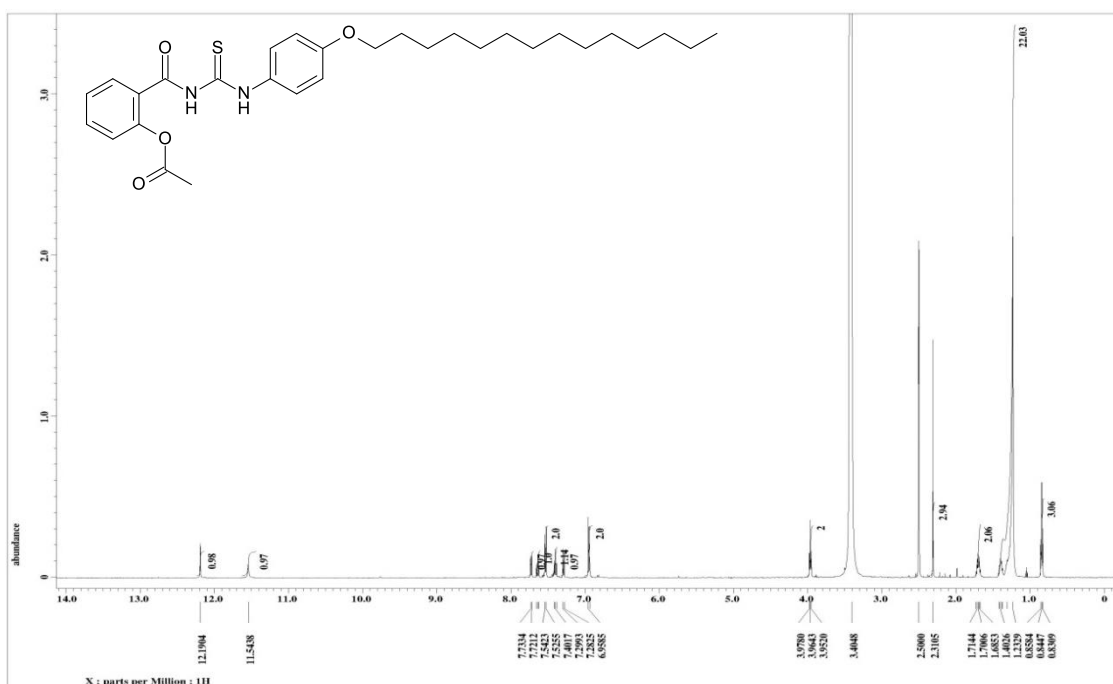

<sup>1</sup>H NMR spectrum of **12**

### 3. $^{13}\text{C}$ NMR spectra of **1-12**

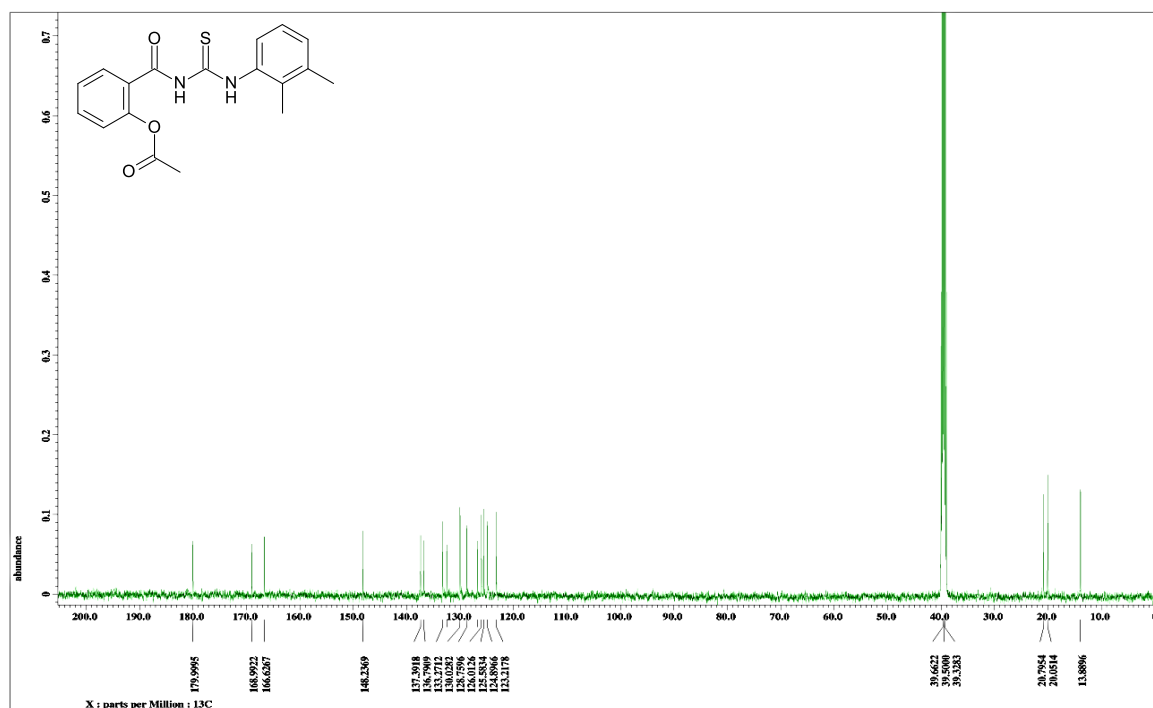

$^{13}\text{C}$  NMR spectrum of **1**

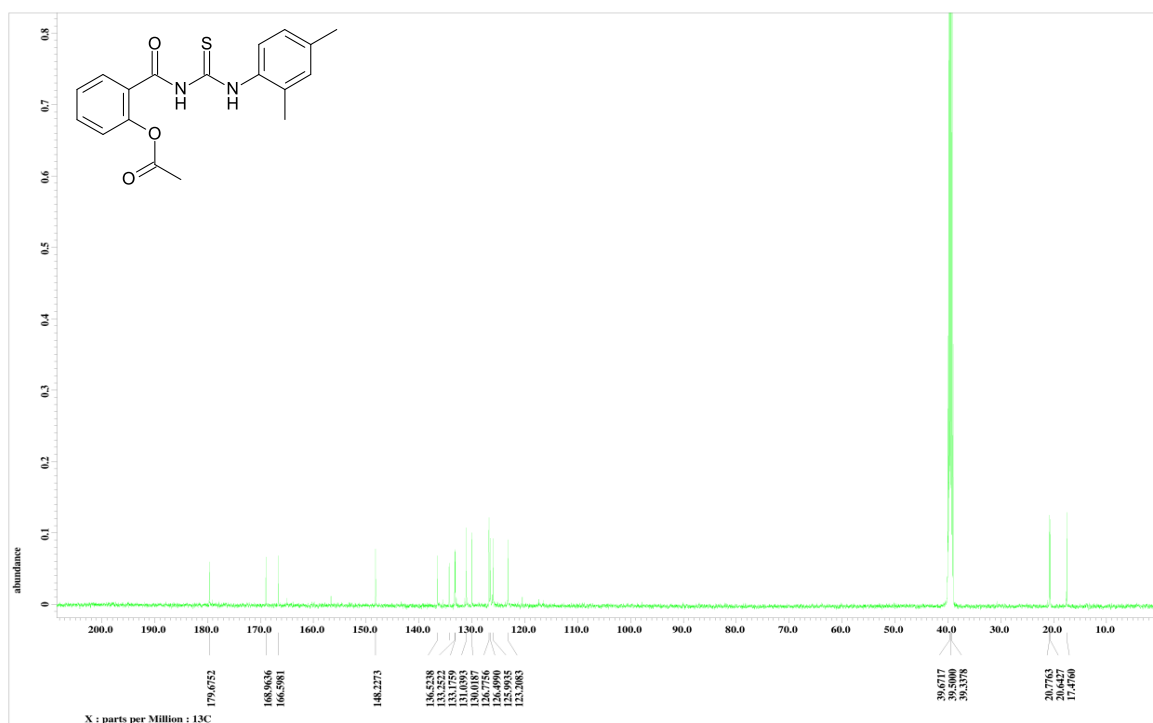

$^{13}\text{C}$  NMR spectrum of **2**

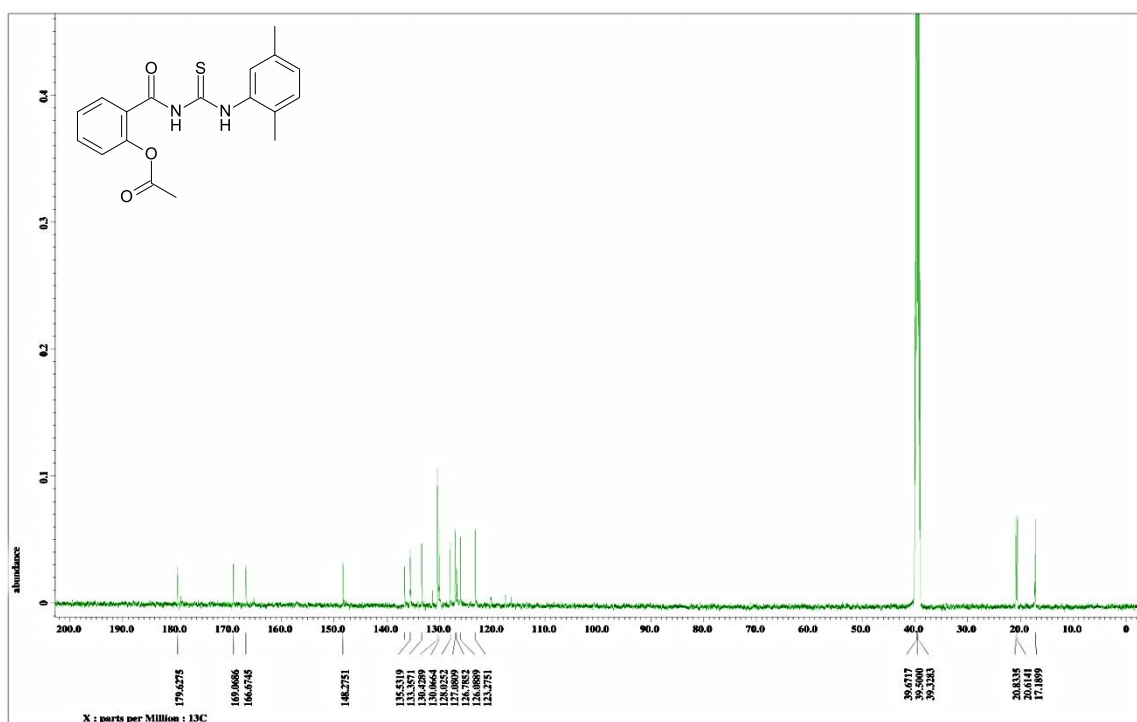

<sup>13</sup>C NMR spectrum of **3**

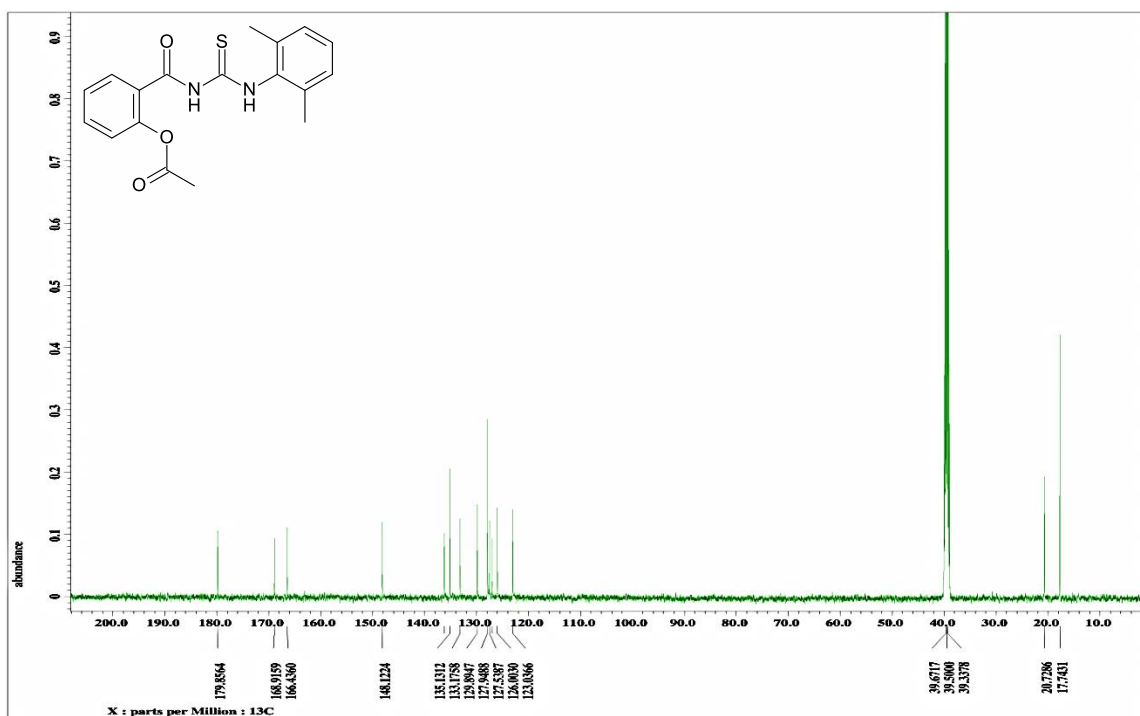

<sup>13</sup>C NMR spectrum of **4**

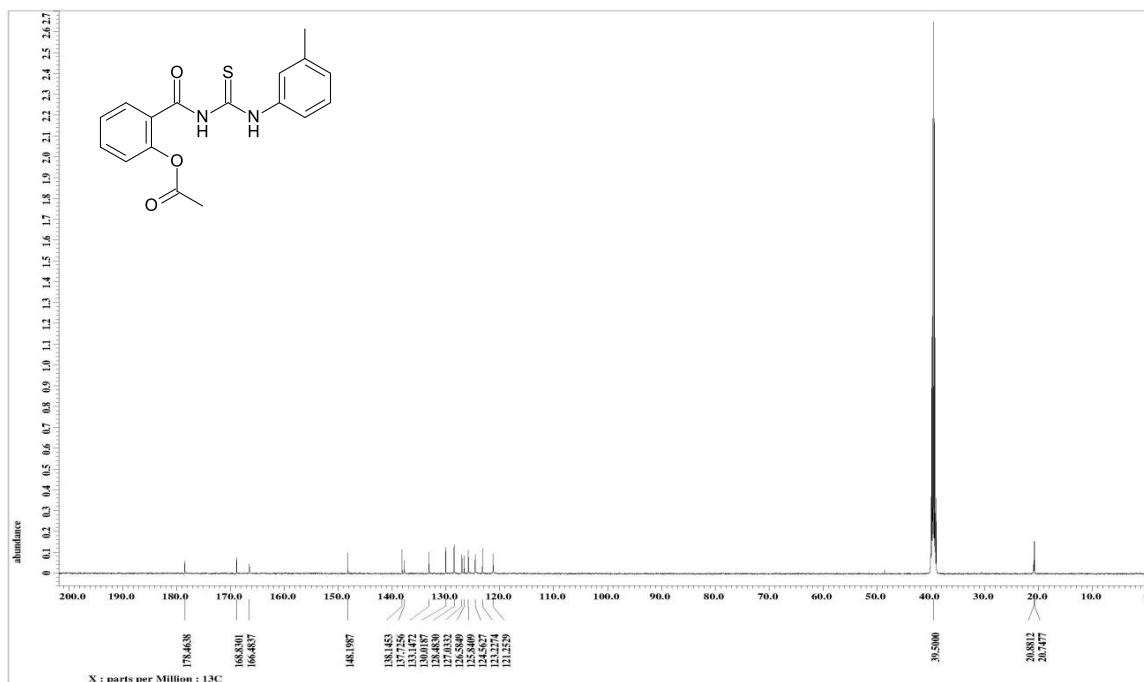

<sup>13</sup>C NMR spectrum of **5**

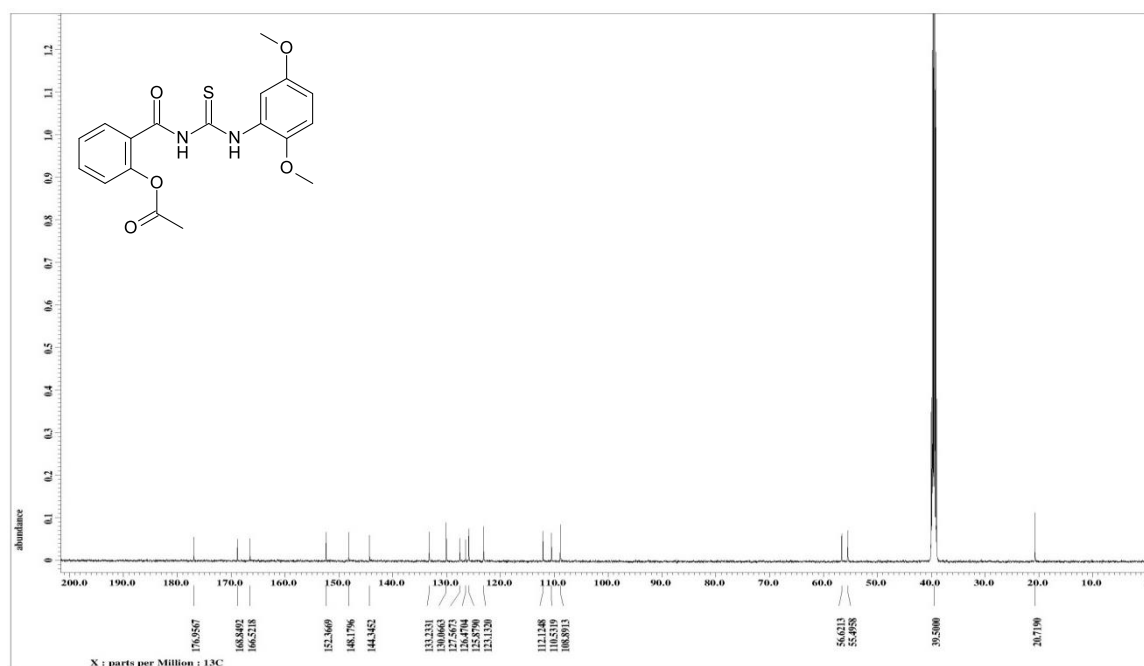

<sup>13</sup>C NMR spectrum of **6**



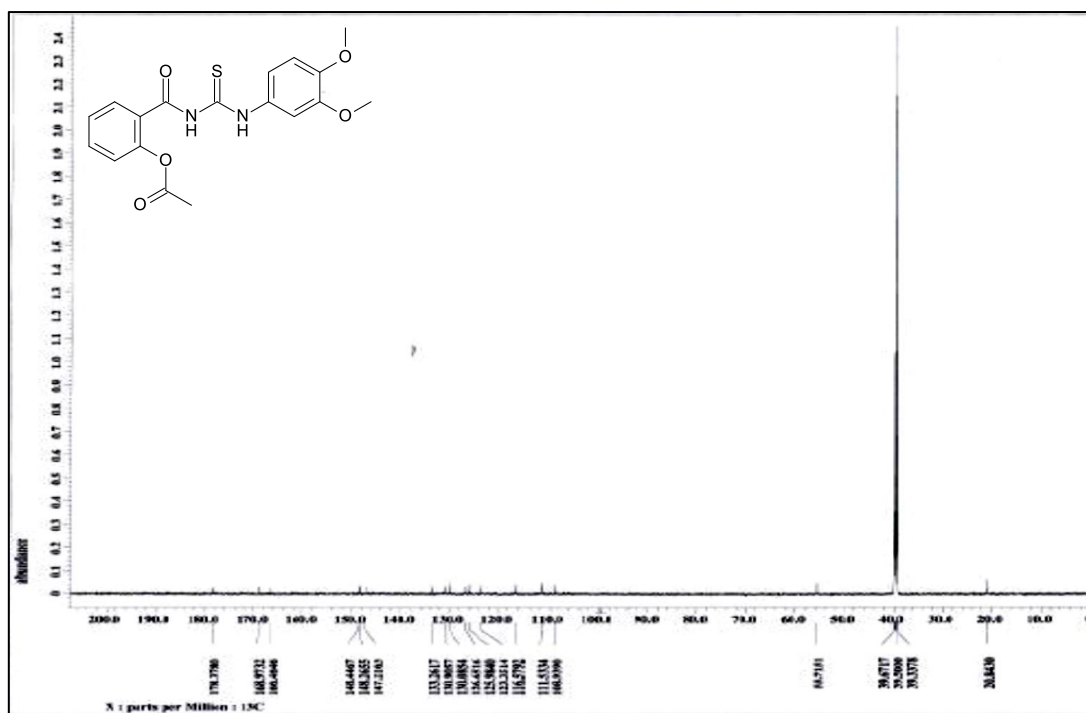

<sup>13</sup>C NMR spectrum of 7

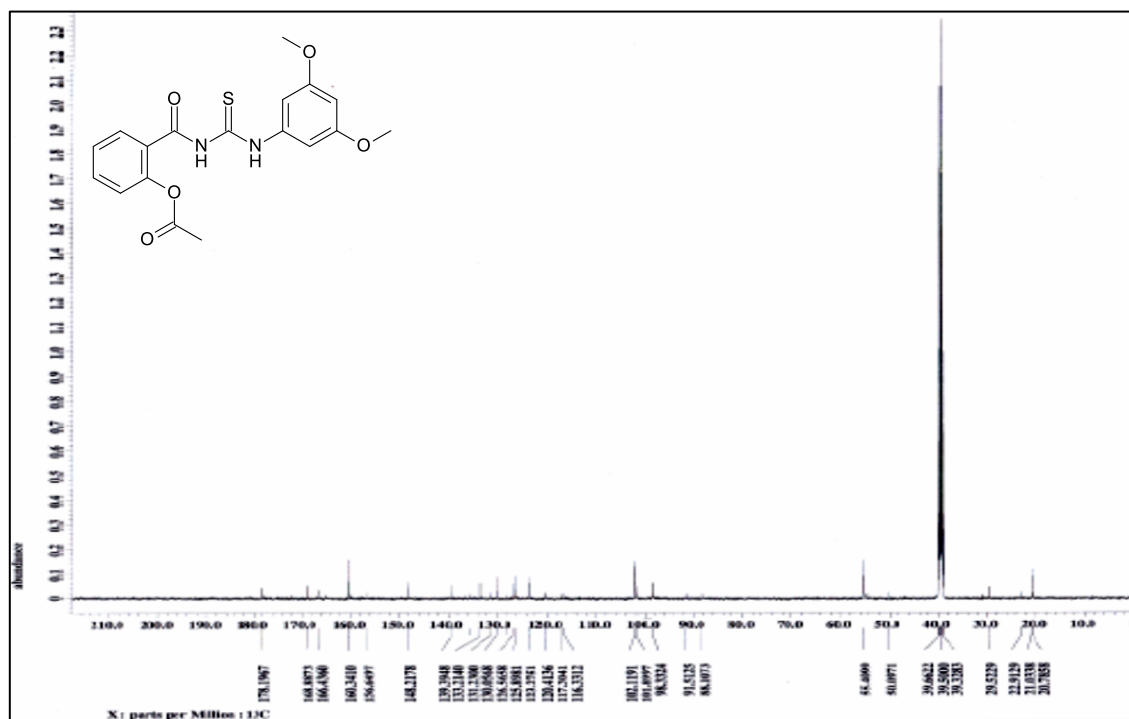

<sup>13</sup>C NMR spectrum of 8

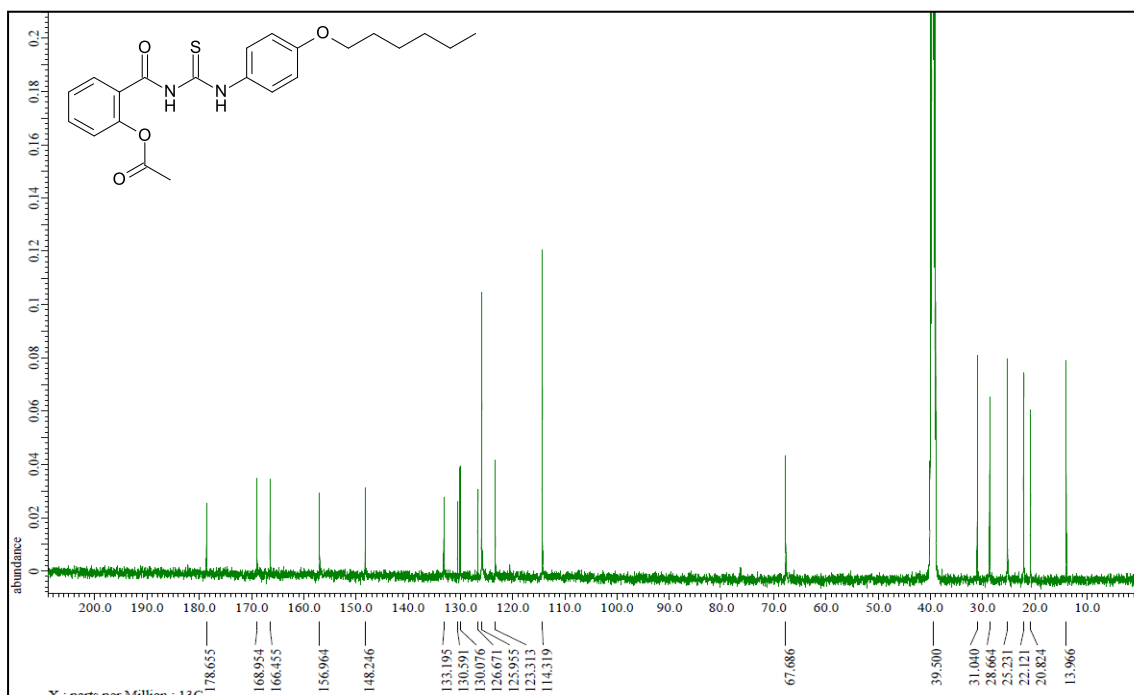

<sup>13</sup>C NMR spectrum of **9**

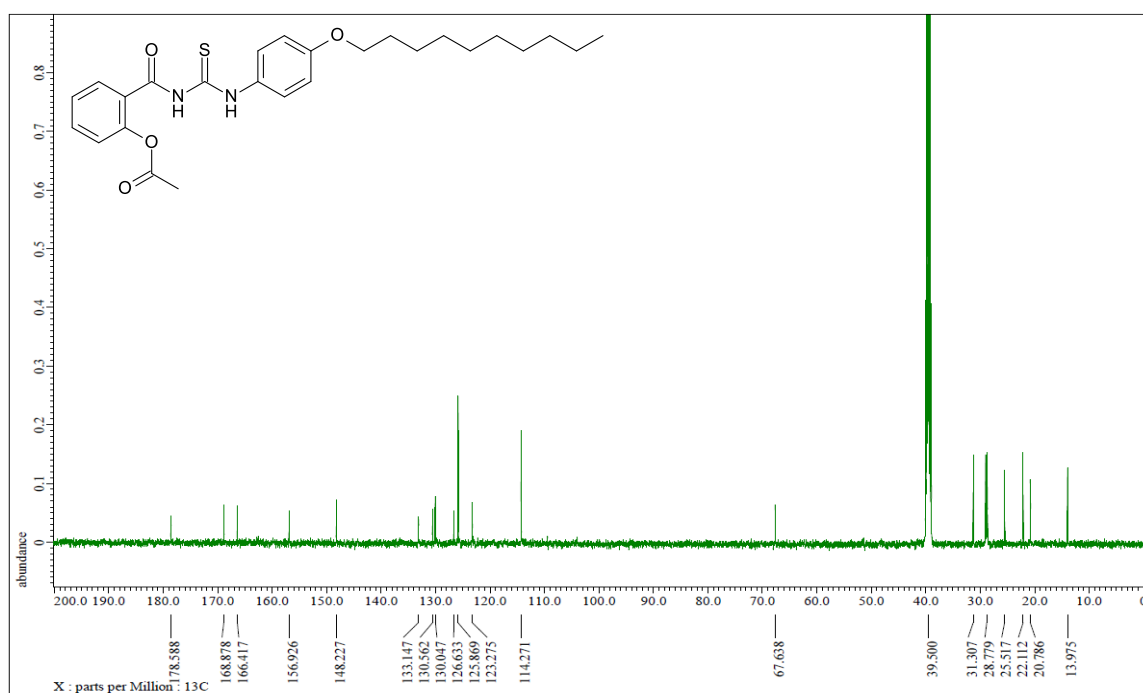

<sup>13</sup>C NMR spectrum of **10**

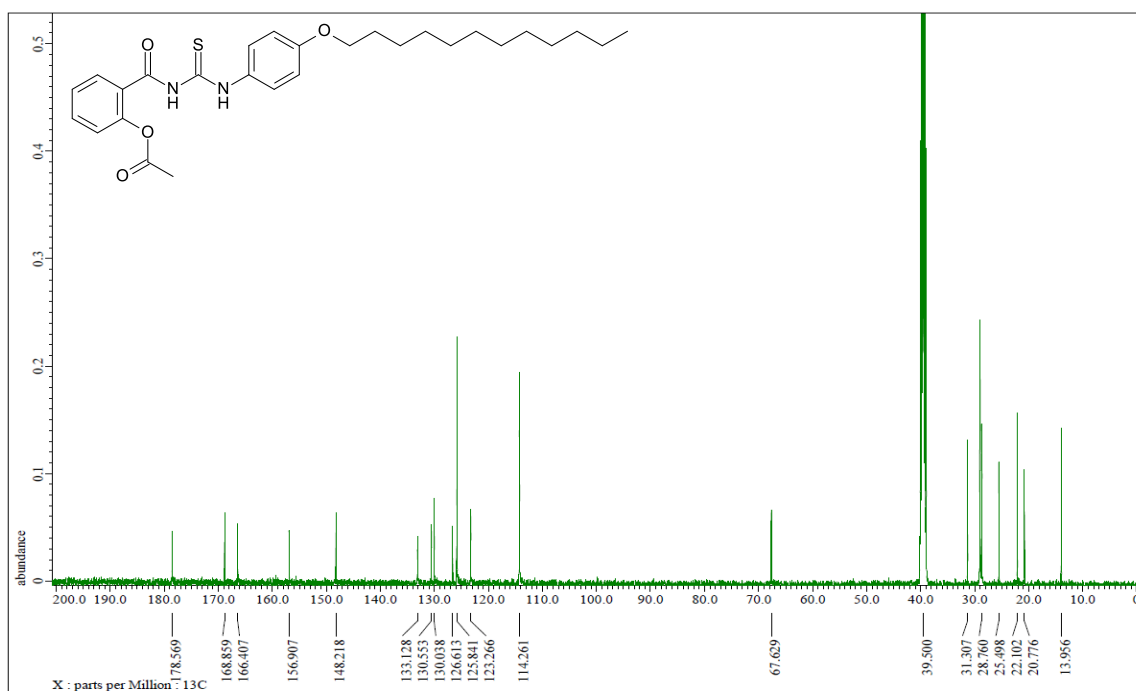

<sup>13</sup>C NMR spectrum of **11**

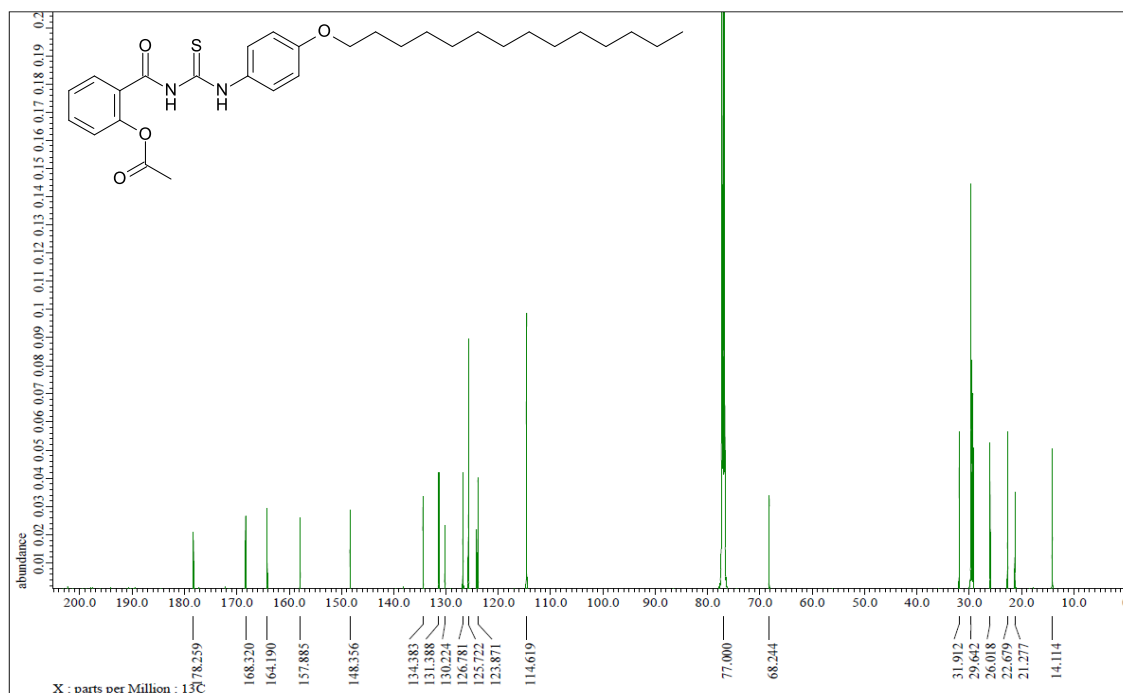

<sup>13</sup>C NMR spectrum of **12**

4. Inhibition zones of **1-12** against *E. coli*

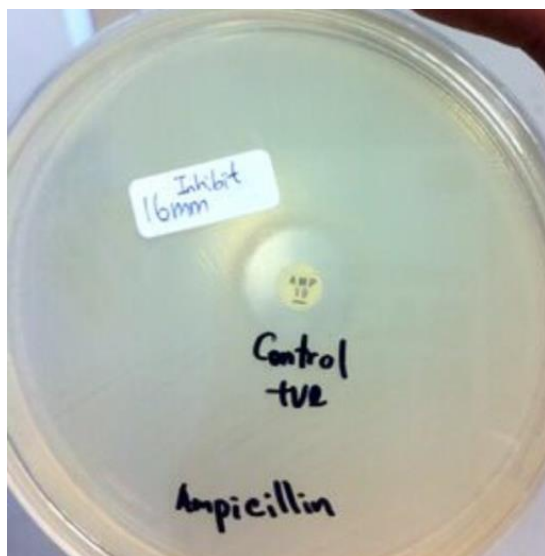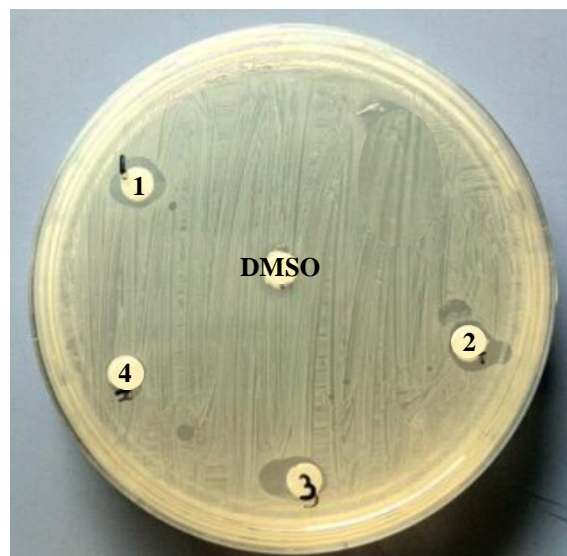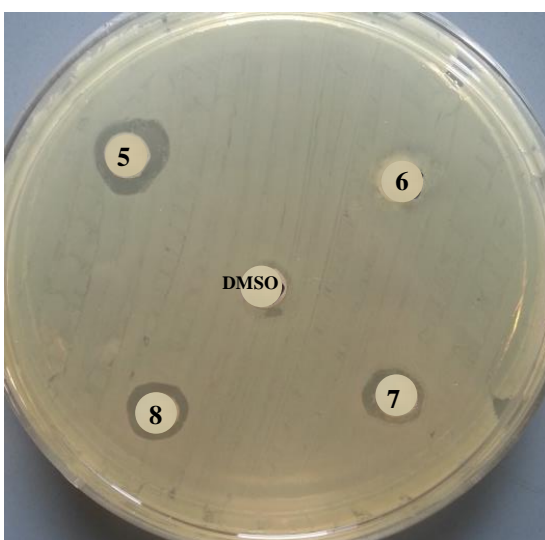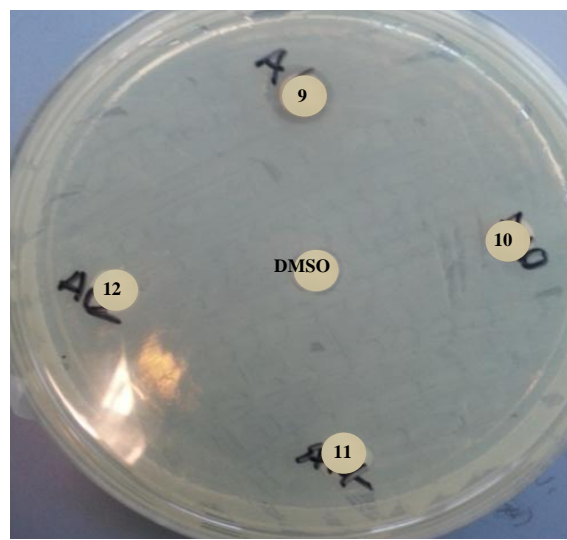

5. Inhibition zones of **1-12** against *S. aureus*

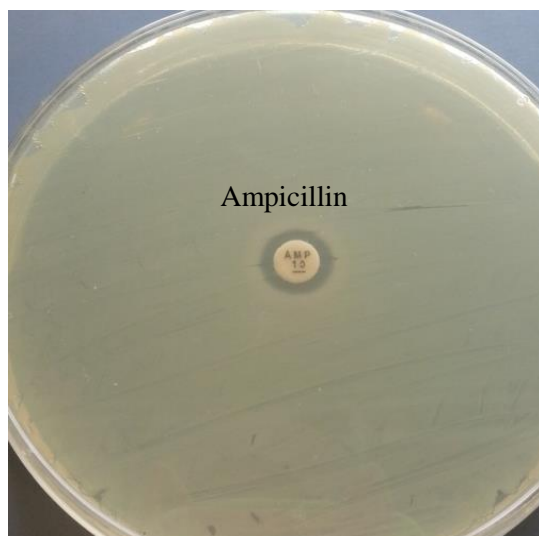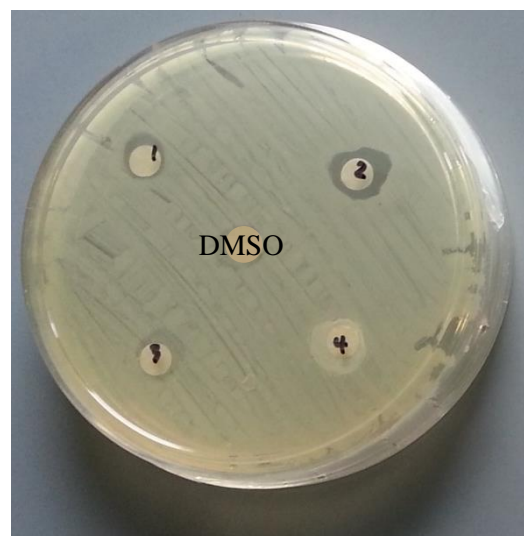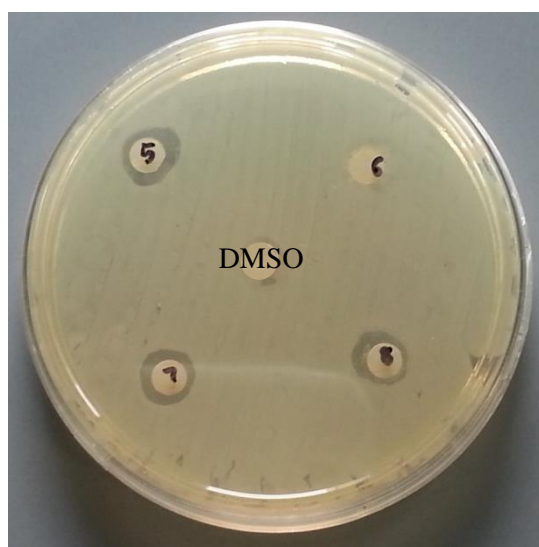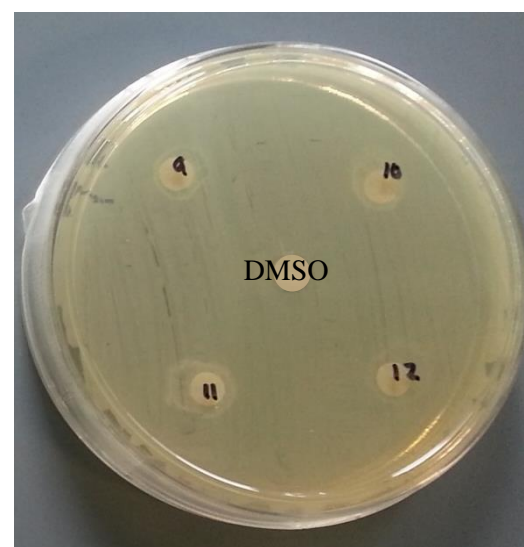

Supplement: f1 [file 2378186.f1.pdf]
